# Supplementary material for: Hormone Replacement Therapy is associated with improved cognition and larger brain volumes in at risk APOE4 women: results from the European Prevention of Alzheimer’s Disease (EPAD) cohort
Source: Research Square preprint supplement (doi:10.21203/rs.3.rs-1853899/v1), 2022-07-22
Supplement: Supplementary file 1 [file 4348074e2599ee69f3caec4b.docx]

## Impact of *APOE* genotype and HRT use on Regional brain volumes

**Supplemental table 1:** **Brain structural outcomes (MRI), volumes (mean±SEM) in mm3, according to HRT use and *APOE4* genotype status**

|  | **Non-E4** | | | **E4** | | | | | **P*APOE*** | | | **P*HRT*** | | | **P*APOE*HRT*** |
| --- | --- | --- | --- | --- | --- | --- | --- | --- | --- | --- | --- | --- | --- | --- | --- |
|  | **no-HRT (n=591-593)** | **HRT (n=48-50)** | **Total (n=639-643)** | | no-HRT**(n=345-347)** | HRT (n=29) | Total **(n=374-376)** |  | |  | | | |  | |
| Right hippocampus | 2360 ±13 | 2383 ±60 | 2362 ±13 | | 2298 ±22 | 2384 ±37 | 2304 ±21 | NS | | NS | | | | NS | |
| Left hippocampus | 2284 ±13 | 2335 ±57 | 2288 ±12 | | 2227 ±22 | 2333 ±43 | 2235 ±20 | NS | | NS | | | | NS | |
| right entorhinal | 2420 ±15 | 2494 ±48 | 2426 ±14 | | 2359 ±22 | 2540 ±81 | 2373 ±22 | NS | | 0.09 | | | | 0.074 | |
| Left entorhinal | 2026 ±12 | 2058 ±39 | 2029 ±12 | | 1957 ±17 | 2172 ±65 | 1974 ±17 | NS | | 0.026a | | | | **0.002** | |
| Right amygdala | 1028 ±07 | 1032 ±21 | 1029 ±06 | | 993 ±11 | 1070 ±31 | 999 ±10 | NS | | NS | | | | **0.005** | |
| left amygdala | 1071 ±07 | 1082 ±19 | 1072 ±06 | | 1031 ±10 | 1116 ±33 | 1038 ±10 | NS | | NS | | | | **0.003** | |
| Right parahippocampal gyrus | 2670 ±13 | 2735 ±50 | 2675 ±13 | | 2624 ±20 | 2670 ±52 | 2628 ±19 | NS | | NS | | | | NS | |
| left parahippocampal gyrus | 2930 ±15 | 2971 ±46 | 2933 ±14 | | 2840 ±20 | 2946 ±59 | 2849 ±19 | NS | | NS | | | | NS | |
| Right Middle Temporal Gyrus | 6587 ±40 | 6831 ±14 | 6606 ±38 | | 6442 ±53 | 6635 ±185 | 6457 ±51 | NS | | NS | | | | NS | |
| left Middle Temporal Gyrus | 5250 ±30 | 5352 ±10 | 5258 ±29 | | 5154 ±38 | 5118 ±123 | 5151 ±36 | NS | | NS | | | | NS | |
| Right superior temporal gyrus | 6223 ±34 | 6391 ±12 | 6236 ±33 | | 6127 ±50 | 6154 ±190 | 6129 ±48 | NS | | NS | | | | NS | |
| left superior temporal gyrus | 6385 ±36 | 6435 ±12 | 6389 ±34 | | 6303 ±50 | 6256 ±148 | 6299 ±47 | NS | | NS | | | | NS | |
| Right anterior cingulate gyrus | 3543 ±25 | 3365 ±97 | 3529 ±24 | | 3564 ±33 | 3405±111 | 3552 ±32 | NS | | **0.003** | | | | NS | |
| left anterior cingulate gyrus | 4384 ±29 | 4286 ±85 | 4376 ±27 | | 4358 ±40 | 4350 ±133 | 4357 ±38 | NS | | 0.062 | | | | NS | |
| Right superior frontal gyrus | 12287 ±59 | 12580 ±17 | 12310 ±56 | | 12103 ±77 | 12001 ±275 | 12095 ±74 | 0.06 | | NS | | | | NS | |
| left superior frontal gyrus | 11582 ±57 | 12166 ±19 | 11627 ±55 | | 11472 ±77 | 11946 ±319 | 11509 ±75 | NS | | **0.009** | | | | NS | |
| Right medial frontal cortex | 1493 ±10 | 1497 ±41 | 1494 ±10 | | 1484 ±16 | 1457 ±42 | 1482 ±15 | NS | | NS | | | | NS | |
| left medial frontal cortex | 1675 ±11 | 1680 ±45 | 1676 ±11 | | 1632 ±15 | 1614 ±51 | 1631 ±15 | NS | | NS | | | | NS | |
| Right middle frontal gyrus | 16282 ±86 | 16101 ±21 | 16268 ±81 | | 16027 ±11 | 16446 ±27 | 16059 ±17 | NS | | NS | | | | 0.06 | |
| left middle frontal gyrus | 16497 ±88 | 16510 ±23 | 16498 ±83 | | 16267 ±12 | 16495 ±33 | 16285 ±11 | NS | | | NS | | NS | | | |

*Mean (mm3) ±SEM of regional MRIbrain volumes, according to APOE4 genotype and HRT use***.** Significant P values for APOE genotype, HRT and APOE*HRT are shown. MANCOVA model was used. Adjustment of the brain regions to the total intracranial volume was carried out before statistical analysis. Age, years of education, marital status, handedness and CDR were used as covariates. p- significant <0.05. a insignificant after FDR correction for multiple comparison. **Bold**: significant after FDR correction
